# Supplementary material
Source: ML conference proceedings conference paper supplement (https://openreview.net/forum?id=AQo1SEElNb)

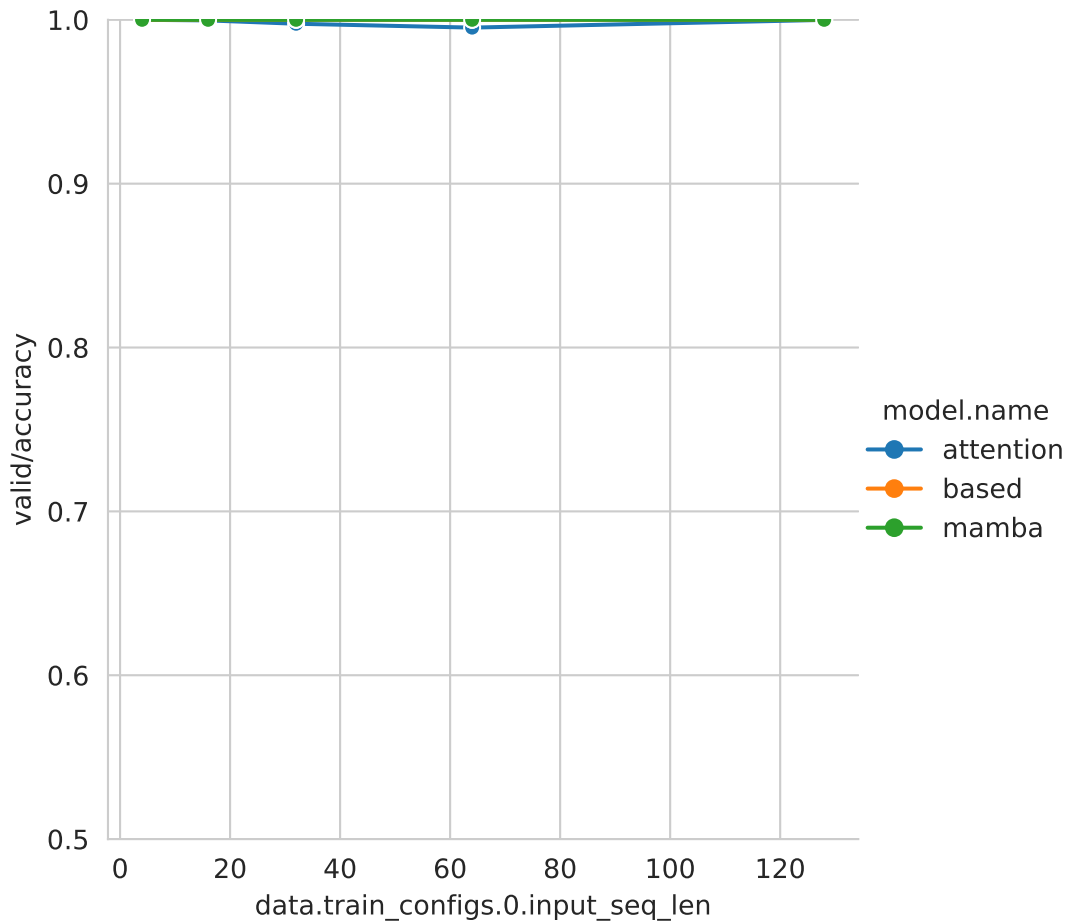

Supplement: supplementary_material [file plot-majority.pdf › exp/zoology/zoology/experiments/arxiv24_based_rebuttal_circuits/plot-majority.pdf]
