# Supplementary material
Source: ML conference proceedings conference paper supplement (https://openreview.net/forum?id=AQo1SEElNb)

# GLA: String copying

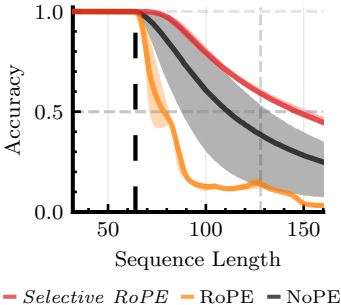

Supplement: supplementary_material [file gla_copying.pdf › plotting/copying/gla_copying.pdf]

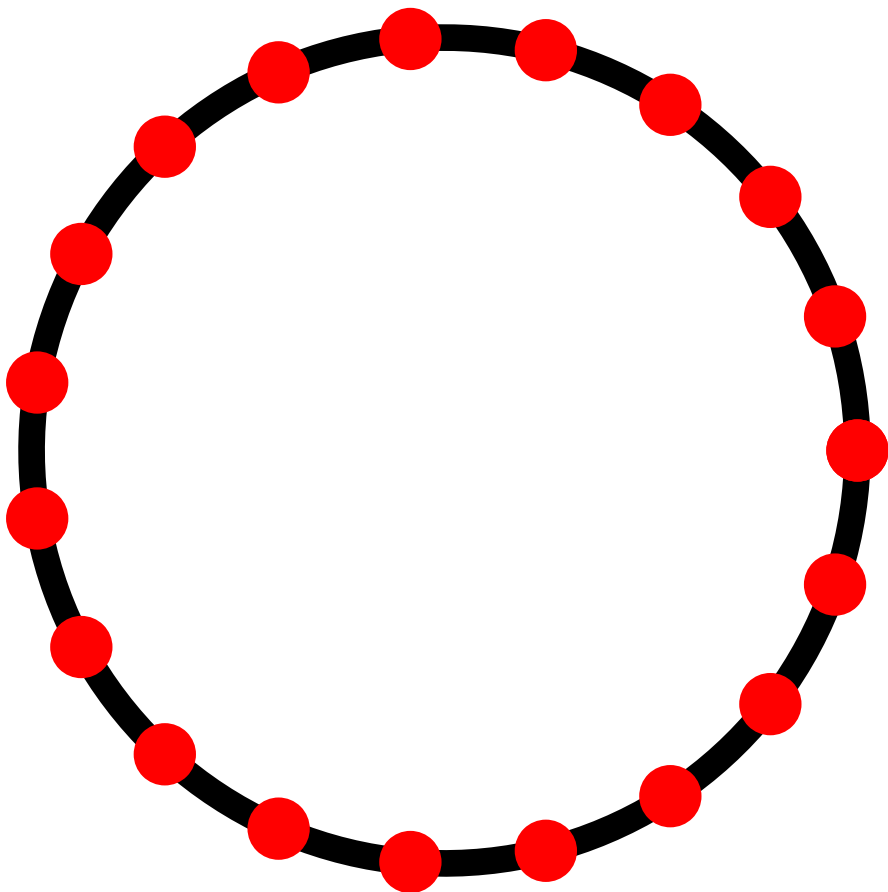

Supplement: supplementary_material [file norm_sel_rope_fixed.pdf › plotting/paper_figures/norm_sel_rope_fixed.pdf]

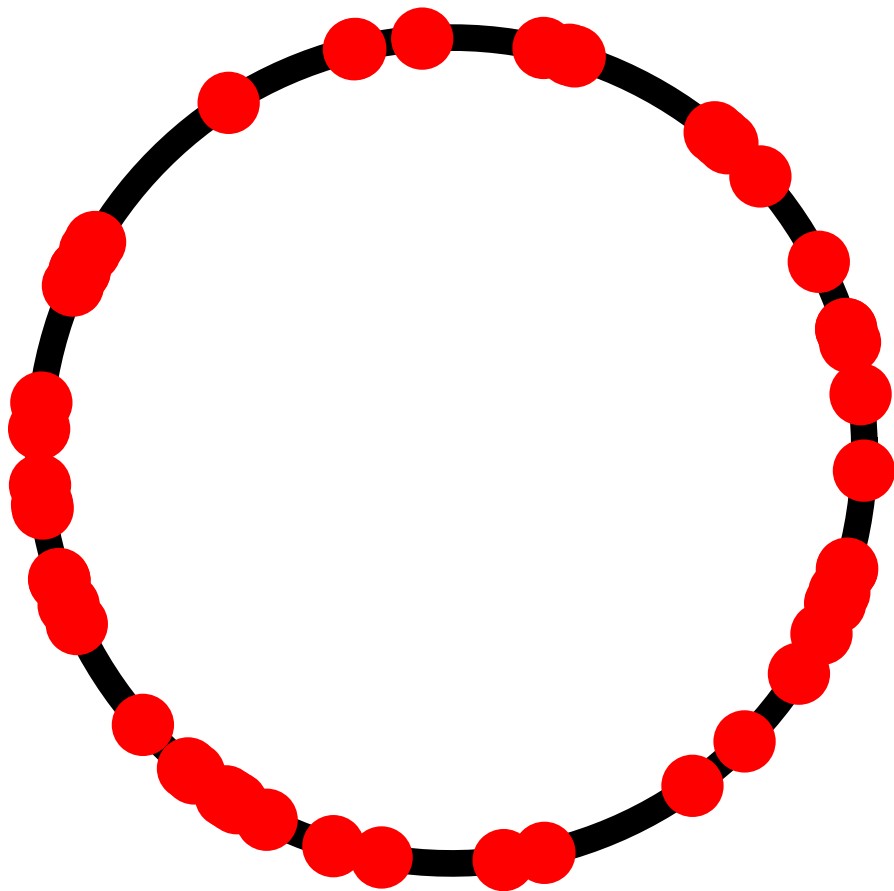

Supplement: supplementary_material [file norm_sel_rope_random.pdf › plotting/paper_figures/norm_sel_rope_random.pdf]

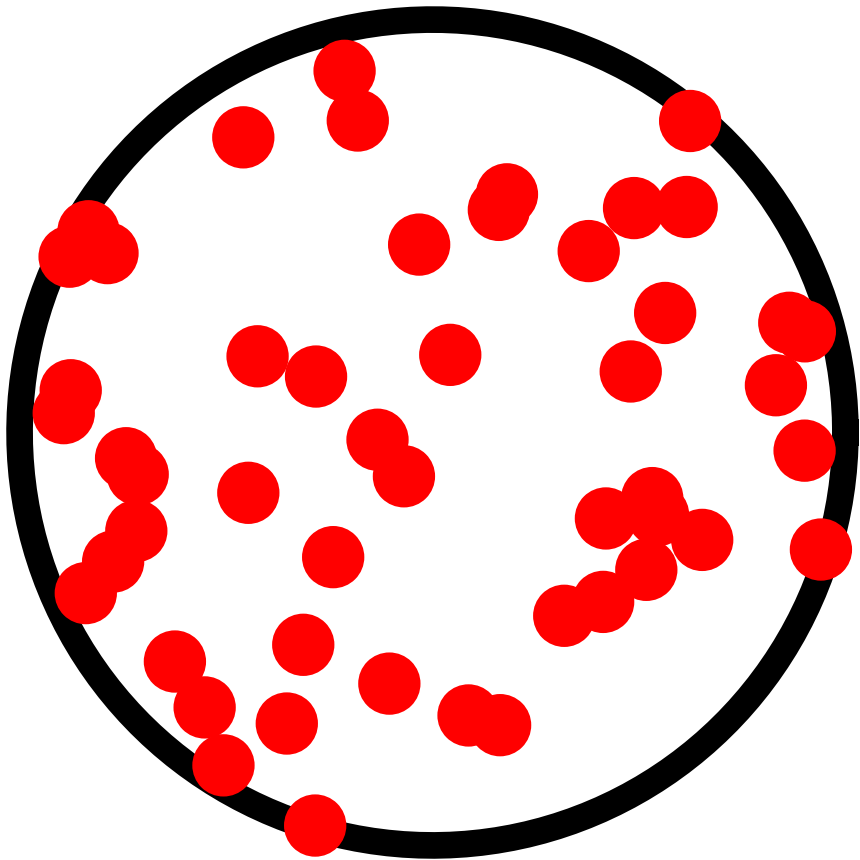

Supplement: supplementary_material [file norm_sel_rope_random_decay.pdf › plotting/paper_figures/norm_sel_rope_random_decay.pdf]

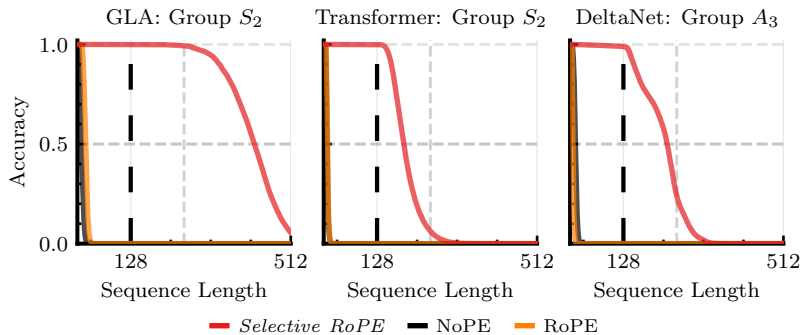

Supplement: supplementary_material [file combined_state_tracking_deltanet.pdf › plotting/state_tracking/combined_state_tracking_deltanet.pdf]

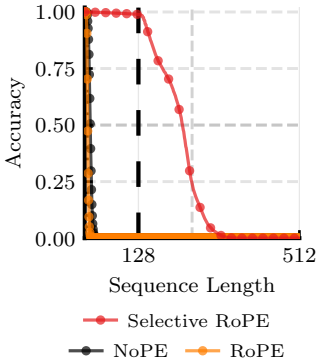

Supplement: supplementary_material [file deltanet_results.pdf › plotting/state_tracking/deltanet_results.pdf]

Group  $S_2$

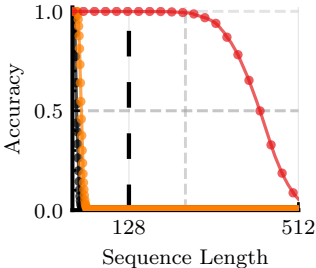

—●— Selective RoPE  
—●— NoPE    —●— RoPE

Supplement: supplementary_material [file s2_gla.pdf › plotting/state_tracking/s2_gla.pdf]

Seq. 512, KV pairs 64

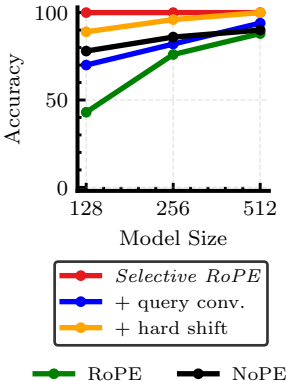

Supplement: supplementary_material [file kv_pairs_gla_ablation.pdf › plotting/zoology/kv_pairs_gla_ablation.pdf]

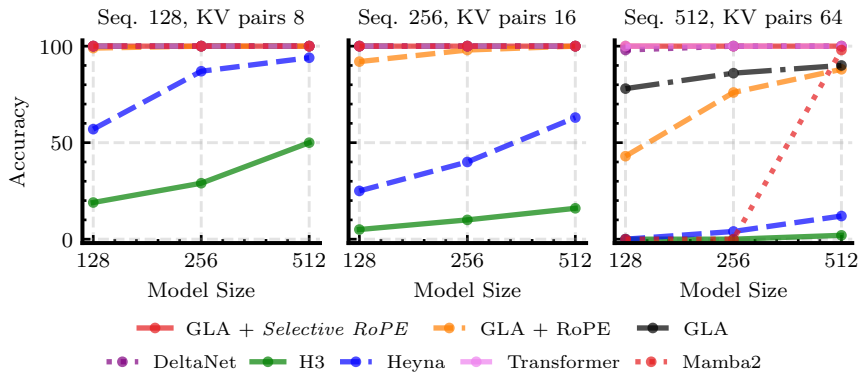

Supplement: supplementary_material [file kv_pairs_gla_mqar.pdf › plotting/zoology/kv_pairs_gla_mqar.pdf]
